# Supplementary material
Source: publisher figshare collection journal article supplement (https://acs.figshare.com/ndownloader/files/9139135)
Supplement: Supplementary file 1 [file 9139135]

## Supporting Information

### **Asymmetric Total Syntheses of Colchicine, $\beta$ -Lumicolchicine and Allocolchicinoid NCME**

Xin Liu<sup>†,‡,#</sup>, Ya-Jian Hu<sup>†,‡,#</sup>, Bo Chen<sup>‡,#</sup>, Long Min<sup>‡</sup>, Xiao-Shui Peng<sup>§</sup>, Jing Zhao<sup>\*,†</sup>,

Shaoping Li<sup>\*,†</sup>, Henry N. C. Wong<sup>§</sup> and Chuang-Chuang Li<sup>\*,†,‡</sup>

*<sup>†</sup> Institute of Chinese Medical Sciences, University of Macau, Macao, China*

*<sup>‡</sup> Department of Chemistry, Southern University of Science and Technology, Shenzhen  
518055, China.*

*<sup>§</sup> Department of Chemistry, The Chinese University of Hong Kong, Shatin, New  
Territories, Hong Kong, China*

*<sup>#</sup> These authors contributed equally to the work.*

## Table of Contents

|      |                                                     |     |
|------|-----------------------------------------------------|-----|
| I.   | General Information.....                            | S3  |
| II.  | Experimental Procedures.....                        | S4  |
| III. | HPLC Analysis of <i>ee</i> Value .....              | S8  |
| IV.  | X-ray Crystallographic Data .....                   | S11 |
| V.   | <sup>1</sup> H and <sup>13</sup> C NMR Spectra..... | S12 |
| VI.  | References.....                                     | S18 |

## I. General Information

Unless otherwise mentioned, all reactions were carried out under a nitrogen atmosphere under anhydrous conditions and all reagents were purchased from commercial suppliers without further purification. Solvent purification was conducted according to *Purification of Laboratory Chemicals* (Peerrin, D. D.; Armarego, W. L. and Perrins, D. R., Pergamon Press: Oxford, 1980). Yields refer to chromatographically and spectroscopically ( $^1\text{H}$  NMR) homogeneous materials, unless otherwise stated. Reactions were monitored by Thin Layer Chromatography on plates (GF254) supplied by Yantai Chemicals (China) using UV light as visualizing agent, an ethanolic solution of phosphomolybdic acid, or basic aqueous potassium permanganate ( $\text{KMnO}_4$ ), and heat as developing agents. If not specially mentioned, flash column chromatography uses silica gel (200-300 mesh) supplied by Tsingtao Haiyang Chemicals (China). Preparative thin layer chromatography (PTLC) separations were carried out on 0.50 mm Yantai (China) silica gel plates. NMR spectra were recorded on Bruker AV500, Bruker ARX400, and calibrated using residual undeuterated solvent as an internal reference ( $\text{CHCl}_3$ ,  $\delta$  7.26 ppm  $^1\text{H}$  NMR,  $\delta$  77.00  $^{13}\text{C}$  NMR). The following abbreviations were used to explain the multiplicities: s = singlet, d = doublet, t = triplet, q = quartet, b = broad, m = multiplet.

High-resolution mass spectra (HRMS) were recorded on a Bruker Apex IV FTMS mass spectrometer using ESI (electrospray ionization). Infrared spectra were recorded on a Shimadzu IR Prestige 21, using thin films of the sample on KBr plates. Optical rotations were measured with a Rudolph autopol I automatic polarimeter using 10 cm glass cells with a sodium 589 nm filter.

## II. Experimental Procedures

### Synthesis of 8

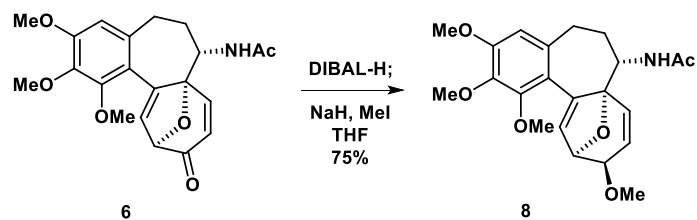

To the solution of **6**<sup>1</sup> (1.0 g, 2.6 mmol) in THF (30 mL) at -78 °C was added DIBAL-H (1M, 3.0 mL), and the reaction solution was stirred at this temperature for 1 h. H<sub>2</sub>O (0.05 mL) was added and stirred at 0 °C for 30 minutes. NaH (60%, 150 mg, 3.9 mmol) was added, followed by MeI (0.74 g, 5.2 mmol), and the resulting mixture was stirred at room temperature for 24 h. The reaction solution was poured into saturated aqueous NH<sub>4</sub>Cl (50 mL) and diluted with ether (150 mL). After separation, the aqueous phase was re-extracted with ether (2 x 50 mL). The combined organic phase was washed with brine (30 mL), dried over Na<sub>2</sub>SO<sub>4</sub>, filtered and concentrated under reduced pressure. Purification of the crude product by flash column chromatography on silica gel (hexane/ethyl acetate = 1/2) afforded **8** (0.78 g, 75% yield) as a white solid.

*R*<sub>f</sub> = 0.3 (hexane/ethyl acetate = 1/2);

[α]<sub>D</sub><sup>20</sup> = 142.0 (c = 0.33, CHCl<sub>3</sub>);

IR (film) λ<sub>max</sub> 3248, 2940, 1630, 1558, 1472, 1099, 891, 729 cm<sup>-1</sup>;

<sup>1</sup>H NMR (400 MHz, CDCl<sub>3</sub>) δ 6.50 (s, 1H), 6.08 (dd, *J* = 9.9, 1.2 Hz, 1H), 5.97 (d, *J* = 1.9 Hz, 1H), 5.86 (d, *J* = 8.5 Hz, 1H), 5.58 – 5.52 (m, 1H), 5.34 – 5.26 (m, 1H), 4.20 – 4.14 (m, 1H), 4.08 – 3.97 (m, 1H), 3.86 – 3.82 (m, 6H), 3.74 (s, 3H), 3.46 (s, 3H), 2.95 – 2.86 (m, 1H), 2.83 – 2.74 (m, 1H), 2.05 – 1.97 (m, 1H), 1.95 (s, 3H), 1.85 – 1.78 (m, 1H);

<sup>13</sup>C NMR (101 MHz, CDCl<sub>3</sub>) δ 169.6, 153.3, 151.2, 148.6, 141.0, 137.6, 134.4, 126.1, 125.8, 119.2, 109.4, 87.8, 80.9, 72.0, 62.3, 61.0, 57.2, 56.1, 50.2, 31.6, 26.4, 23.5;

HRMS (ESI) calcd for C<sub>22</sub>H<sub>28</sub>O<sub>6</sub>N [M+H]<sup>+</sup>: 402.1911; found: 402.1906.

### Synthesis 9

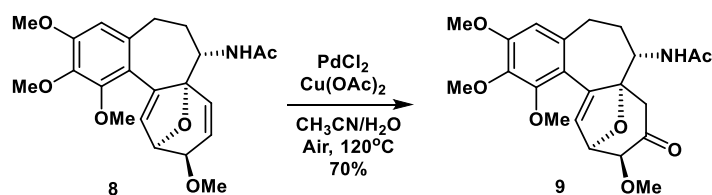

PdCl<sub>2</sub> (4.5 mg, 0.025 mmol) and Cu(OAc)<sub>2</sub> (10 mg, 0.05 mmol) were charged in a resealable 20-mL vial under air. A mixture of MeCN (2.7 mL) and water (0.3 mL) was added. After the addition of the corresponding substrate **8** (20 mg, 0.05 mmol), the homogenous reaction mixture was stirred for 16 h at 120 °C under O<sub>2</sub> atmosphere. The crude reaction mixture was then diluted with brine (10 mL) and ether (10 mL), the phases were separated and the aqueous phase was further extracted with ether (5 mL x 2). The combined organic phases were washed with brine (5 mL), dried over Na<sub>2</sub>SO<sub>4</sub>, filtered, concentrated under reduced pressure and purified directly via column chromatography on silica gel (hexane/ethyl acetate = 1/3) to give **9** (15 mg, 70% yield) as a white solid.

*R<sub>f</sub>* = 0.2 (hexane/ethyl acetate = 1/2);

[ $\alpha$ ]<sub>D</sub><sup>26</sup> = 86.7 (c = 0.5, CHCl<sub>3</sub>);

IR (film)  $\lambda_{\text{max}}$  2932, 1651, 1504, 1198, 1308, 799 cm<sup>-1</sup>;

<sup>1</sup>H NMR (500 MHz, CDCl<sub>3</sub>)  $\delta$  6.46 (s, 1H), 6.19 (d, *J* = 1.8 Hz, 1H), 5.91 (d, *J* = 9.2 Hz, 1H), 5.13 (dd, *J* = 4.9, 1.9 Hz, 1H), 4.02 – 3.96 (m, 1H), 3.96 (d, *J* = 4.9 Hz, 1H), 3.84 (s, 3H), 3.82 (s, 3H), 3.76 (s, 3H), 3.67 (s, 3H), 3.02 – 2.96 (m, 1H), 2.89 – 2.82 (m, 1H), 2.64 (d, *J* = 16.0 Hz, 1H), 2.27 (d, *J* = 16.0 Hz, 1H), 2.19 – 2.12 (m, 1H), 2.03 (s, 3H), 1.83 – 1.76 (m, 1H);

<sup>13</sup>C NMR (101 MHz, CDCl<sub>3</sub>)  $\delta$  204.19, 169.54, 153.61, 151.23, 142.11, 140.43, 134.24, 128.85, 117.36, 108.62, 89.79, 84.78, 78.80, 61.29, 60.68, 59.89, 55.97, 49.99, 47.25, 31.70, 27.06, 23.47;

HRMS (ESI) calcd for C<sub>22</sub>H<sub>28</sub>O<sub>7</sub>N [M+H]<sup>+</sup>: 418.1860; found: 418.1852.

#### Synthesis of colchicine (**1**)

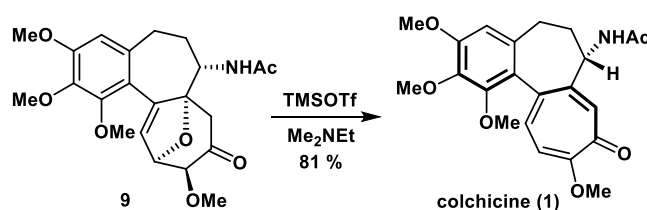

Trimethylsilyl trifluoromethanesulfonate (0.06 mL) was added dropwise at 0 °C to a solution of **9** (20 mg, 0.048 mmol) and *N,N*-dimethylethylamine (0.1 mL) in DCM (5 mL). After the reaction mixture was stirred at room temperature for 12 h, saturated aqueous NaHCO<sub>3</sub> (5 mL) was added. After separation, the aqueous phase was further extracted with DCM (5 mL x 2). The combined organic phases were washed with saturated NH<sub>4</sub>Cl (10 mL), brine (5 mL) and dried over Na<sub>2</sub>SO<sub>4</sub>. The solution was concentrated under reduced pressure and purified by chromatography (DCM/MeOH = 9/1) to afford **1** (16 mg, 81%) as a white solid.

$R_f = 0.3$  (DCM/MeOH = 9/1);

$[\alpha]_D^{20} = -150$  ( $c = 0.33$ ,  $\text{CHCl}_3$ );

IR (film) 3315, 3240, 2935, 1732, 1614, 1487, 1249, 1138, 1020  $\text{cm}^{-1}$ ;

$^1\text{H NMR}$  (500 MHz,  $\text{CDCl}_3$ )  $\delta$  8.42 (d,  $J = 4.4$  Hz, 1H), 7.68 (s, 1H), 7.37 (d,  $J = 10.7$  Hz, 1H), 6.92 (d,  $J = 10.9$  Hz, 1H), 6.53 (s, 1H), 4.74 – 4.57 (m, 1H), 4.02 (s, 3H), 3.93 (s, 3H), 3.90 (s, 3H), 3.65 (s, 3H), 2.52 (m, 1H), 2.41 – 2.32 (m, 2H), 2.02 – 1.97 (m, 1H), 1.95 (s, 3H).

$^{13}\text{C NMR}$  (126 MHz,  $\text{CDCl}_3$ )  $\delta$  179.3, 170.2, 164.0, 153.5, 153.0, 151.1, 141.5, 137.2, 135.8, 134.3, 130.3, 125.5, 113.2, 107.2, 61.6, 61.3, 56.4, 56.1, 52.8, 36.3, 29.8, 22.7;

HRMS-ESI calcd for  $\text{C}_{22}\text{H}_{26}\text{O}_6\text{N}$   $[\text{M}+\text{H}]^+$ : 400.1755, found 400.1747.

#### Synthesis of $\beta$ -lumicolchicine (**3**)

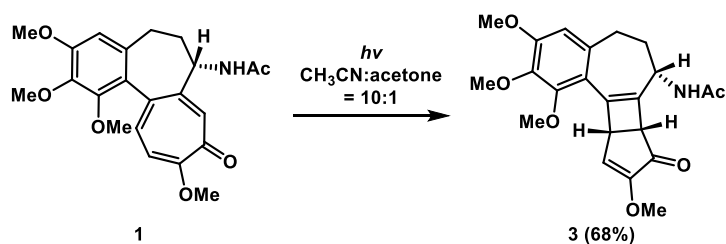

Colchicine **1** (10 mg, 0.025 mmol) were dissolved in a mixture solution of acetonitrile and acetone (10:1, 8 mL) and irradiated for 25 minutes with a 125-W high-pressure mercury arc lamp surrounded by a Pyrex water jacket. The solvent was evaporated under reduced pressure, and the crude product was purified by a flash column chromatography on silica gel (DCM/MeOH = 16/1) to give  $\beta$ -Lumicolchicine **3** (6.8 mg, 68%) as white solids.

$R_f = 0.51$  (DCM/MeOH = 8/1).

$[\alpha]_D^{26} = +249$  ( $c = 1.0$ ,  $\text{CHCl}_3$ ) {lit.  $[\alpha] + 304$  ( $c = 0.5$ ,  $\text{CHCl}_3$ )};<sup>2</sup>

$^1\text{H NMR}$  (400 MHz,  $\text{CDCl}_3$ )  $\delta$  6.65 (d,  $J = 2.9$  Hz, 1H), 6.46 (s, 1H), 6.00 (d,  $J = 6.9$  Hz, 1H), 4.80 (d,  $J = 4.6$  Hz, 1H), 4.09 (d,  $J = 2.5$  Hz, 1H), 3.95 (s, 3H), 3.86 (s, 3H), 3.84 (s, 3H), 3.68 (s, 3H), 3.60 (s, 1H), 2.74 (dd,  $J = 15.3, 9.1$  Hz, 1H), 2.56 (dd,  $J = 15.3, 9.5$  Hz, 1H), 2.04 (s, 3H), 1.98 – 1.83 (m, 2H);

$^{13}\text{C NMR}$  (101 MHz,  $\text{CDCl}_3$ )  $\delta$  200.81, 170.27, 157.77, 153.09, 151.72, 145.10, 140.29, 138.81, 137.37, 128.80, 117.73, 109.17, 61.38, 60.83, 56.83, 55.93, 51.44, 51.35, 43.17, 32.54, 31.31, 23.50;

**HRMS (ESI)** Calcd for  $C_{22}H_{25}NO_6Na$   $[M+Na]^+$ : 422.1574; Found: 422.1573.

### Synthesis of NCME (2)

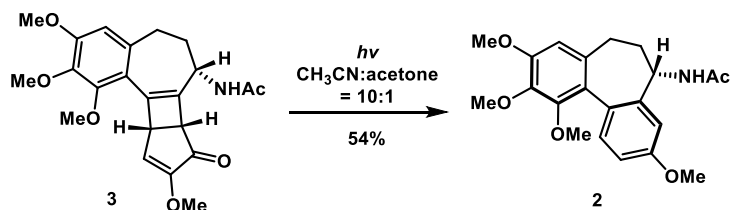

$\beta$ -Lumicolchicine **3** (10 mg, 0.024 mmol) were dissolved in a mixture solution of acetonitrile and acetone (10:1, 8 mL) and irradiated for 20 minutes with a 125-W high-pressure mercury arc lamp surrounded by a Pyrex water jacket. The solvent was evaporated under reduced pressure, and the crude product was purified by a flash column chromatography on silica gel (DCM/MeOH = 16/1) to give **2** (4.8 mg) in 54% yield as a white solid. Anal. data are consistent with those described in reference.<sup>3</sup>

$R_f = 0.53$  (DCM/MeOH = 8/1);

$[\alpha]_D^{26} = -30$  ( $c = 1.0$ ,  $CHCl_3$ ) {lit.  $[\alpha] - 65$  ( $c = 0.0056$ ,  $CHCl_3$ )};<sup>3</sup>

**$^1H$  NMR** (400 MHz,  $DMSO-d_6$ )  $\delta$  8.40 (d,  $J = 8.6$  Hz, 1H), 7.26 (d,  $J = 8.3$  Hz, 1H), 6.95 – 6.84 (m, 2H), 6.78 (s, 1H), 4.53 (dt,  $J = 12.0, 7.9$  Hz, 1H), 3.84 (s, 3H), 3.80 (s, 3H), 3.78 (s, 3H), 3.47 (s, 3H), 2.48 (d,  $J = 5.3$  Hz, 1H), 2.15 (dd,  $J = 12.1, 6.3$  Hz, 1H), 2.10 – 2.02 (m, 1H), 1.89 (s, 3H), 1.85 (d,  $J = 5.4$  Hz, 1H);

**$^{13}C$  NMR** (101 MHz,  $DMSO-d_6$ )  $\delta$  168.84, 158.83, 152.56, 150.79, 142.28, 141.04, 135.21, 131.04, 126.62, 124.77, 111.21, 109.91, 108.57, 61.00, 60.95, 56.30, 55.44, 48.57, 38.97, 30.60, 23.13;

**HRMS (ESI)** Calcd for  $C_{21}H_{26}NO_5$   $[M+H]^+$ : 372.1805; Found: 372.1824.

### III. HPLC Analysis of *ee* Value

(a)

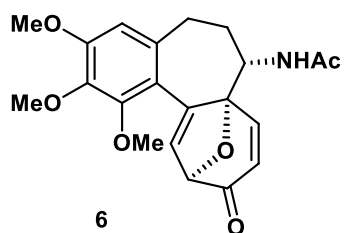

HPLC analysis: Daicel Chiralpak AD-H column; hexane/*i*-propanol = 75:25, 1 mL/min,  $\lambda$  = 254 nm;  $t_R$ (major) = 4.6 min,  $t_R$ (minor) = 5.6 min. > 99% *ee*.

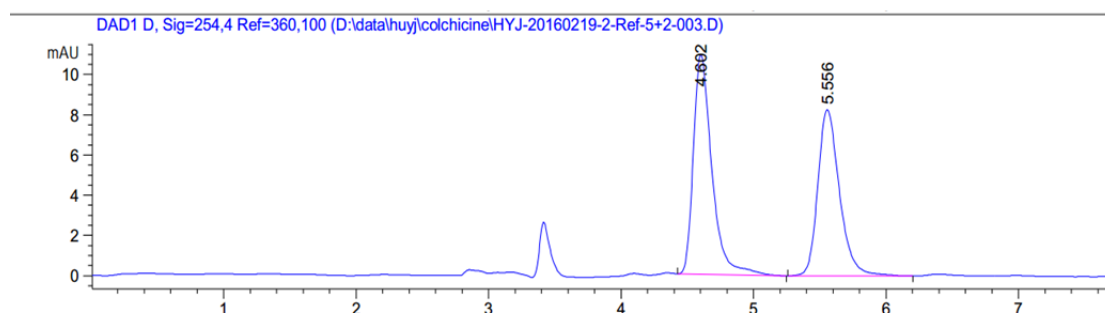

| Peak # | RetTime [min] | Type | Width [min] | Area [mAU*s] | Height [mAU] | Area %  |
|--------|---------------|------|-------------|--------------|--------------|---------|
| 1      | 4.602         | BB   | 0.1456      | 106.28229    | 10.91946     | 53.0118 |
| 2      | 5.556         | BB   | 0.1726      | 94.20567     | 8.28594      | 46.9882 |

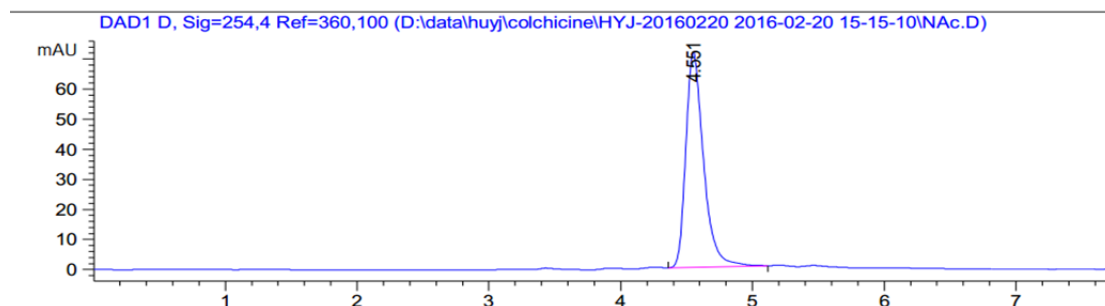

| Peak # | RetTime [min] | Type | Width [min] | Area [mAU*s] | Height [mAU] | Area %   |
|--------|---------------|------|-------------|--------------|--------------|----------|
| 1      | 4.551         | BB   | 0.1406      | 667.80676    | 71.76360     | 100.0000 |



(b)

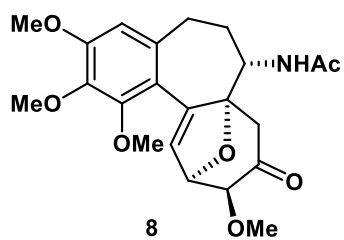

HPLC analysis: Daicel Chiralpak AD-H column; hexane/*i*-propanol = 80:20, 1 mL/min,  $\lambda$  = 260 nm;  $t_R$ (minor) = 7.4 min,  $t_R$ (major) = 11.3 min. > 99% *ee*.

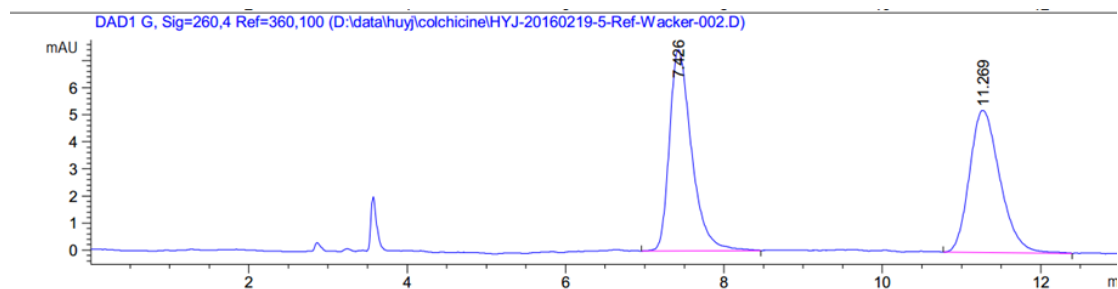

| Peak # | RetTime [min] | Type | Width [min] | Area [mAU*s] | Height [mAU] | Area %  |
|--------|---------------|------|-------------|--------------|--------------|---------|
| 1      | 7.426         | BB   | 0.2945      | 144.26382    | 7.42947      | 50.7805 |
| 2      | 11.269        | BB   | 0.4066      | 139.82912    | 5.25265      | 49.2195 |

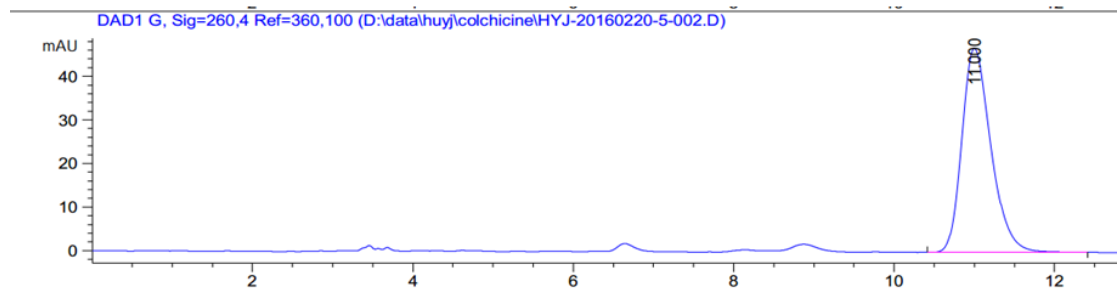

| Peak # | RetTime [min] | Type | Width [min] | Area [mAU*s] | Height [mAU] | Area %   |
|--------|---------------|------|-------------|--------------|--------------|----------|
| 1      | 11.000        | BB   | 0.3891      | 1185.07092   | 46.84715     | 100.0000 |

(c)

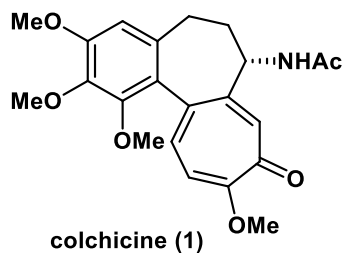

HPLC analysis: Daicel Chiralpak AD-H column; hexane/*i*-propanol = 70:30, 1 mL/min,  $\lambda$  = 254 nm;  $t_R$ (major) = 4.9 min,  $t_R$ (major) = 7.0 min. > 99% *ee*.

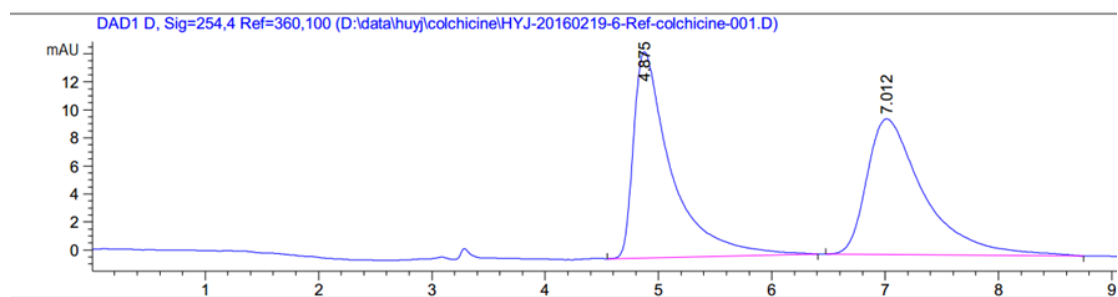

| Peak # | RetTime [min] | Type | Width [min] | Area [mAU*s] | Height [mAU] | Area %  |
|--------|---------------|------|-------------|--------------|--------------|---------|
| 1      | 4.875         | BB   | 0.3311      | 339.20428    | 14.70766     | 50.2097 |
| 2      | 7.012         | BB   | 0.5098      | 336.37128    | 9.66964      | 49.7903 |

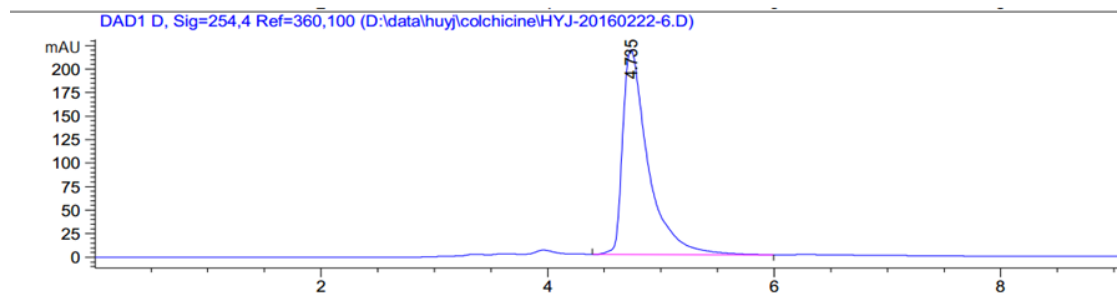

| Peak # | RetTime [min] | Type | Width [min] | Area [mAU*s] | Height [mAU] | Area %   |
|--------|---------------|------|-------------|--------------|--------------|----------|
| 1      | 4.735         | BB   | 0.2301      | 3401.63550   | 217.92906    | 100.0000 |

#### IV. X-ray Crystallographic DataX-Ray data for 8:

Crystal data and structure refinement for **8** (CCDC 1563364).

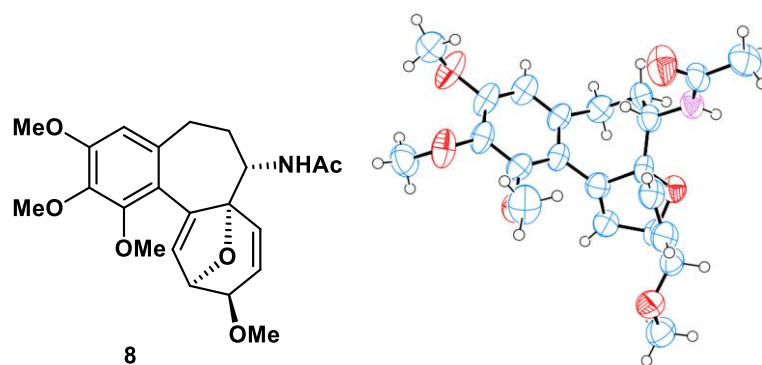

Table 1 Crystal data and structure refinement for **8**.

|                                             |                                                               |
|---------------------------------------------|---------------------------------------------------------------|
| Identification code                         | 20170719                                                      |
| Empirical formula                           | C <sub>22</sub> H <sub>27</sub> NO <sub>6</sub>               |
| Formula weight                              | 401.44                                                        |
| Temperature/K                               | 293                                                           |
| Crystal system                              | monoclinic                                                    |
| Space group                                 | P2 <sub>1</sub>                                               |
| a/Å                                         | 7.467(3)                                                      |
| b/Å                                         | 9.477(5)                                                      |
| c/Å                                         | 14.485(5)                                                     |
| α °                                         | 90                                                            |
| β °                                         | 97.593(8)                                                     |
| γ °                                         | 90                                                            |
| Volume/Å <sup>3</sup>                       | 1016.1(8)                                                     |
| Z                                           | 2                                                             |
| ρ <sub>calc</sub> /g/cm <sup>3</sup>        | 1.312                                                         |
| μ /mm <sup>2</sup>                          | 0.786                                                         |
| F(000)                                      | 428.0                                                         |
| Crystal size/mm <sup>3</sup>                | 0.2 tal size/mm                                               |
| Radiation                                   | CuK α uKiationize/mm                                          |
| 2uKiationize/mmladeructure ref              | 6.156 to 135.818                                              |
| Index ranges                                | -8 ex ranges.818aderucture refinement                         |
| Reflections collected                       | 5523                                                          |
| Independent reflections                     | 2732 [R <sub>int</sub> = 0.0916, R <sub>sigma</sub> = 0.0753] |
| Data/restraints/parameters                  | 2732/1/268                                                    |
| Goodness-of-fit on F <sup>2</sup>           | 1.120                                                         |
| Final R indexes [I>=2eters                  | R <sub>1</sub> = 0.0654, wR <sub>2</sub> = 0.1660             |
| Final R indexes [all data]                  | R <sub>1</sub> = 0.0873, wR <sub>2</sub> = 0.2212             |
| Largest diff. peak/hole / e Å <sup>-3</sup> | 0.25/-0.29                                                    |
| Flack parameter                             | 1.2(4)                                                        |

## V. $^1\text{H}$ and $^{13}\text{C}$ NMR Spectra

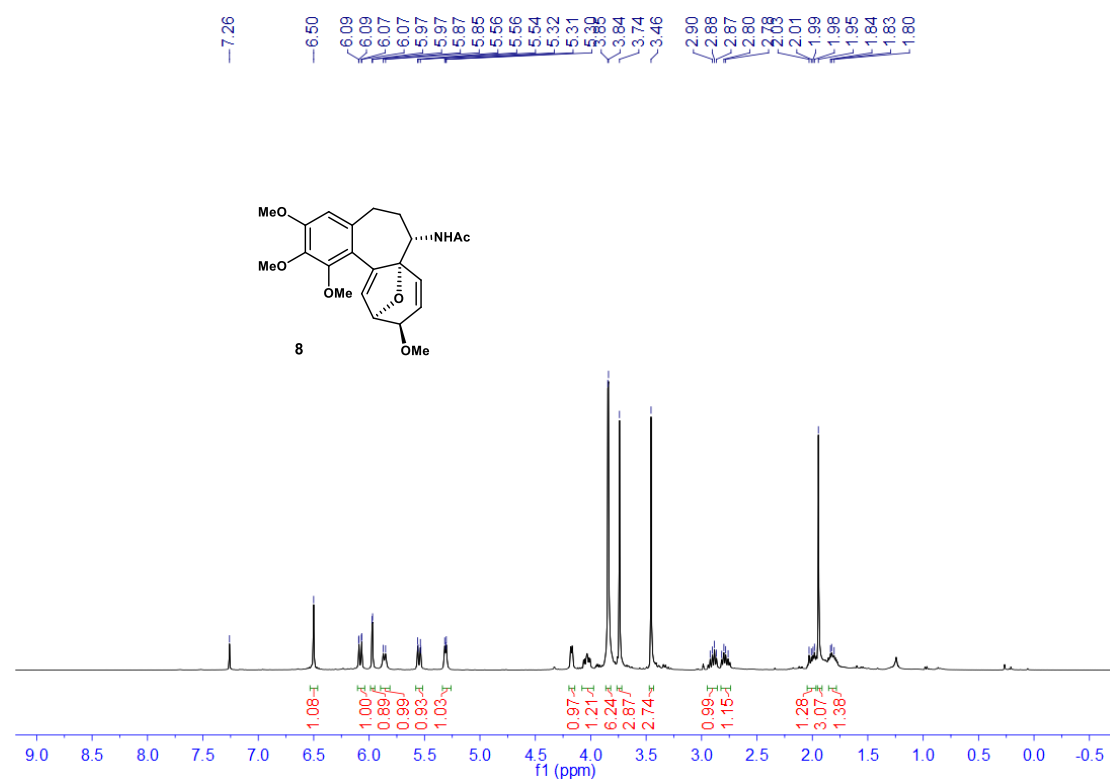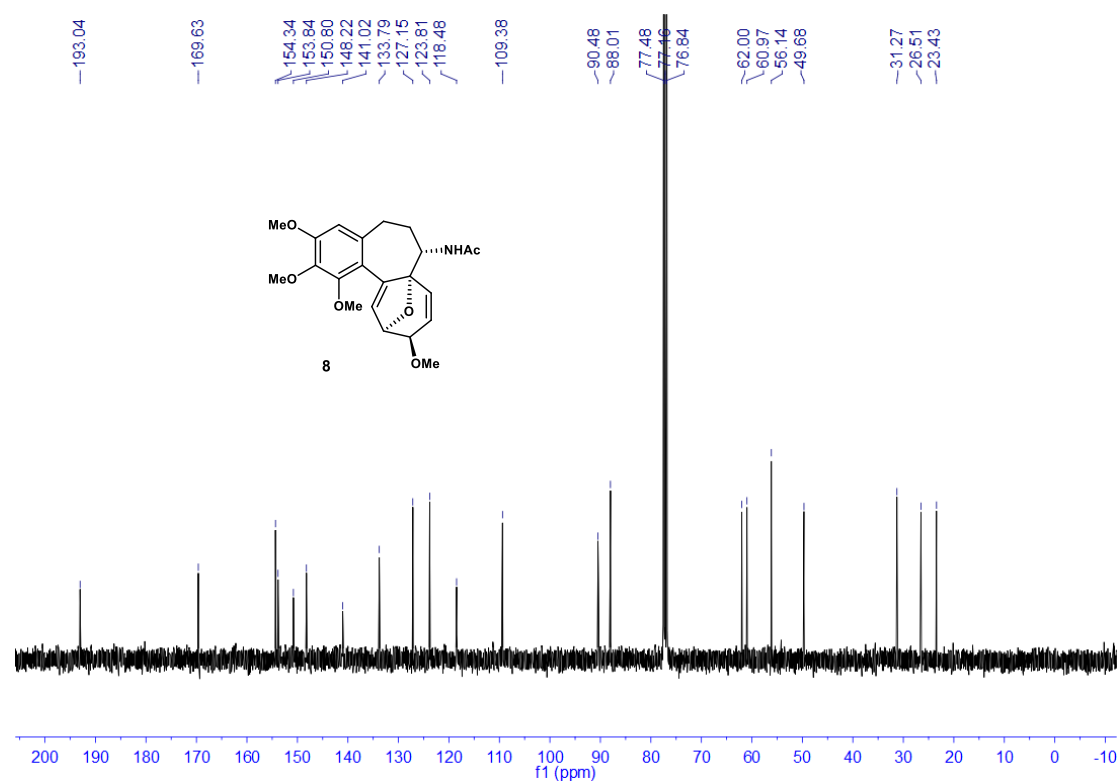

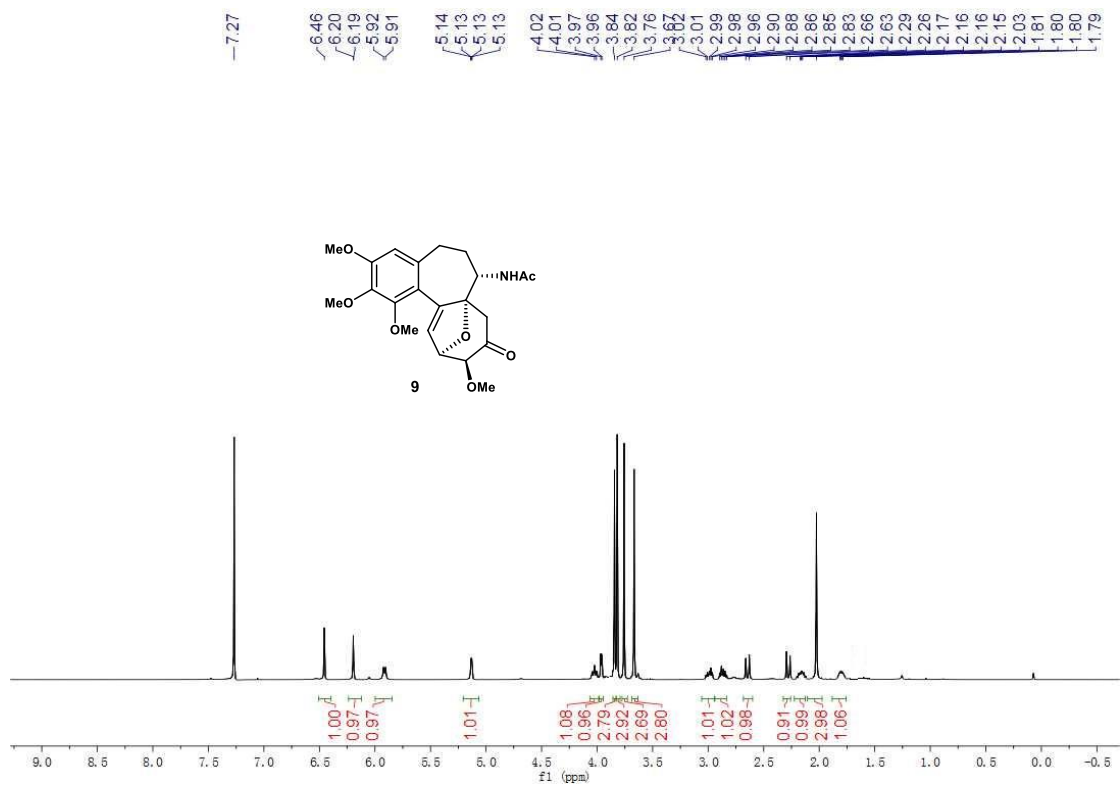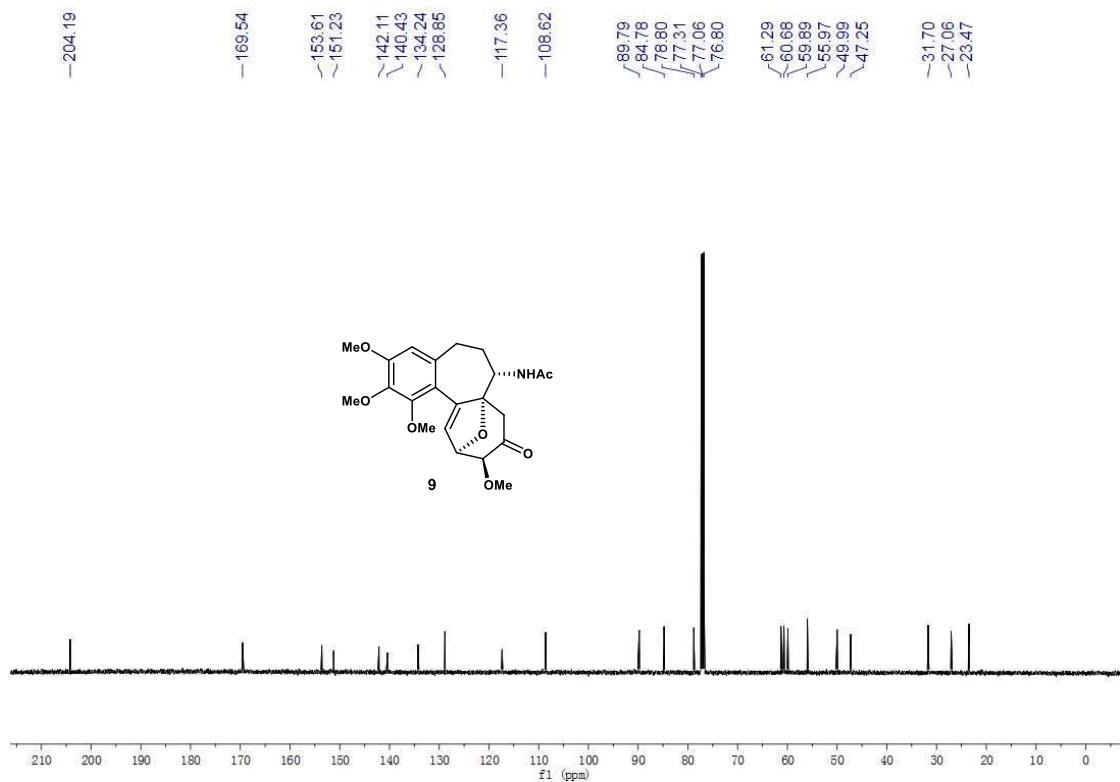

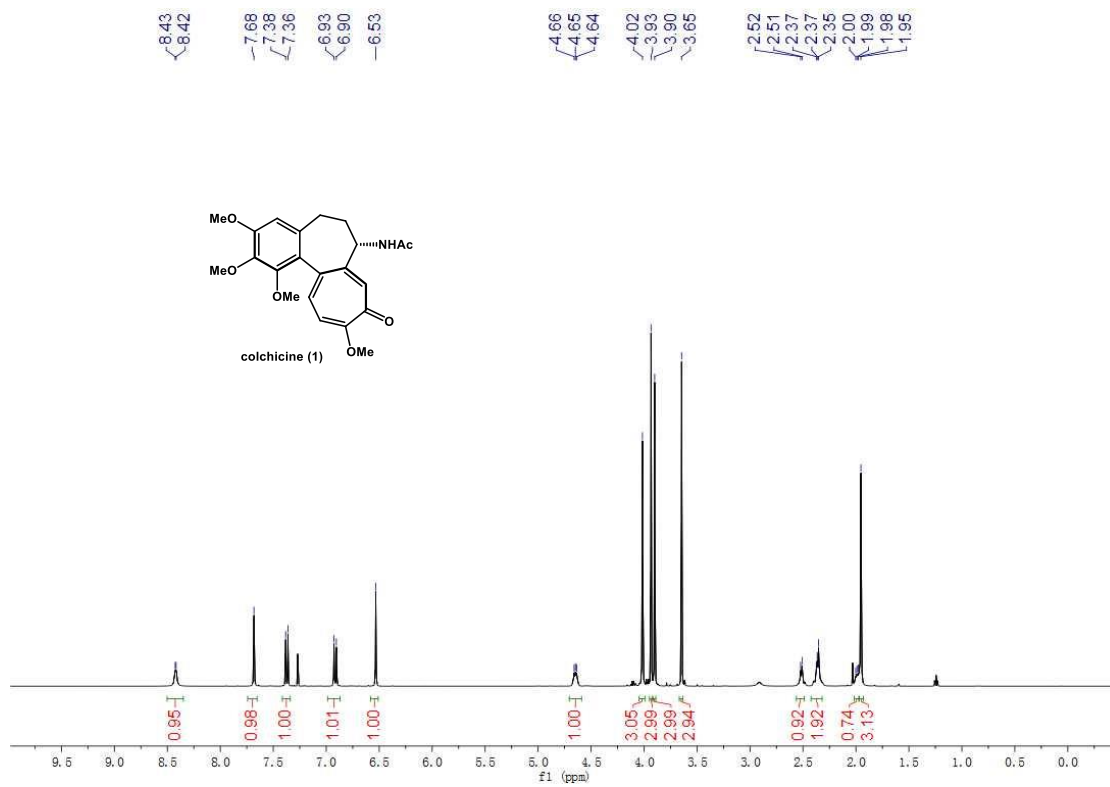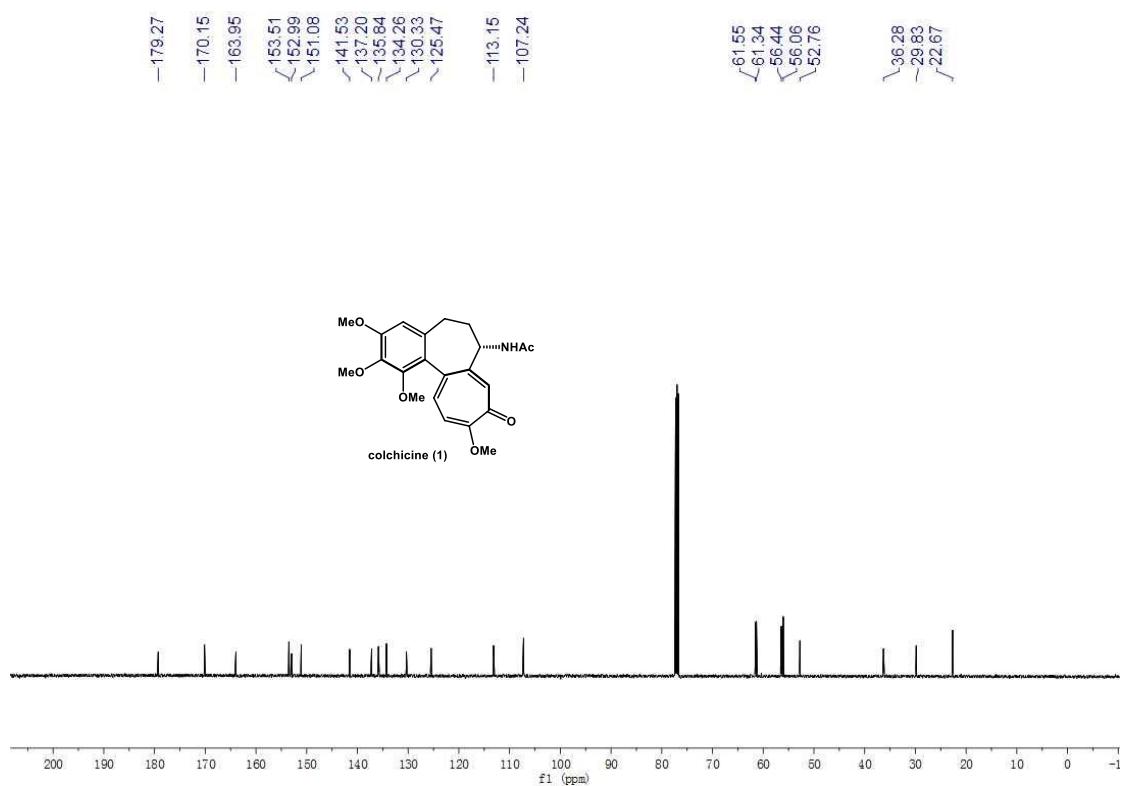

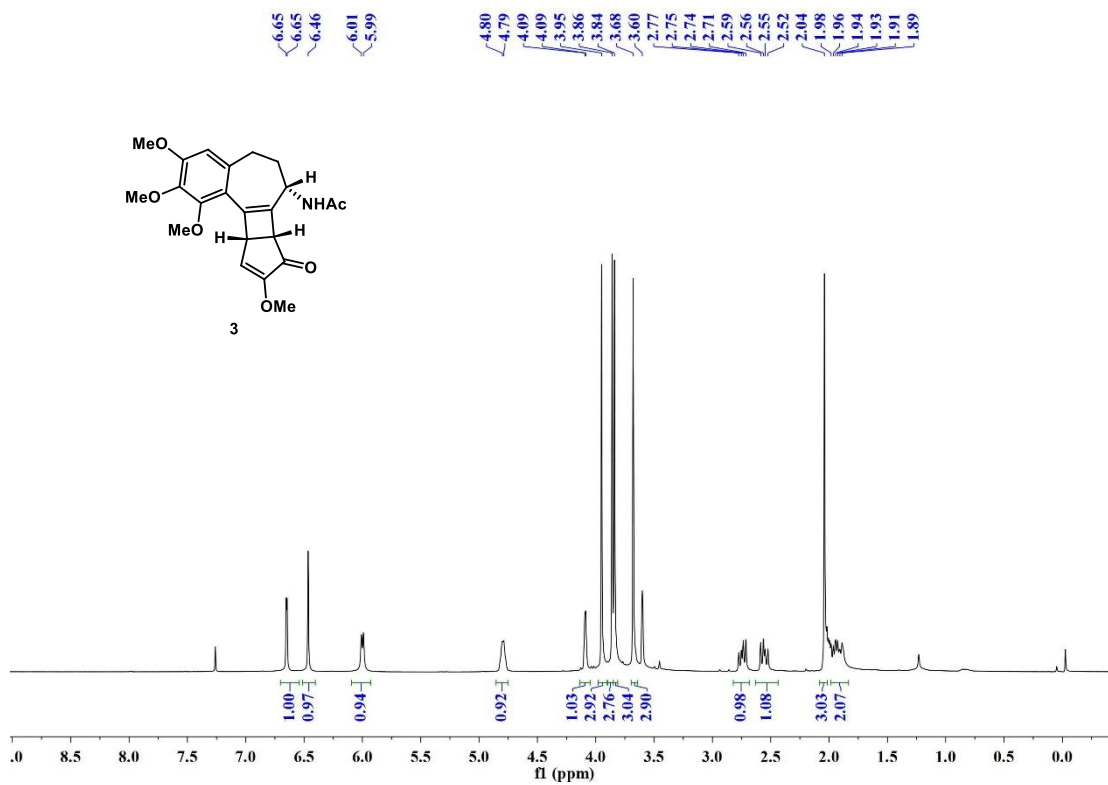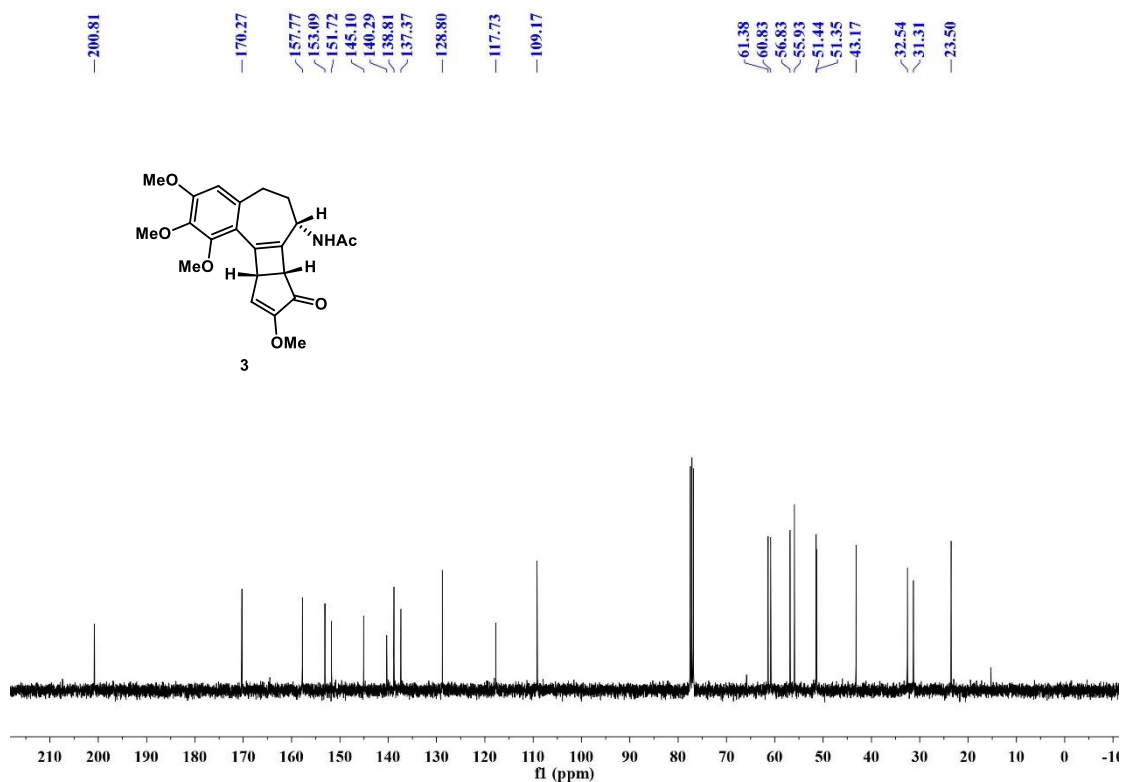

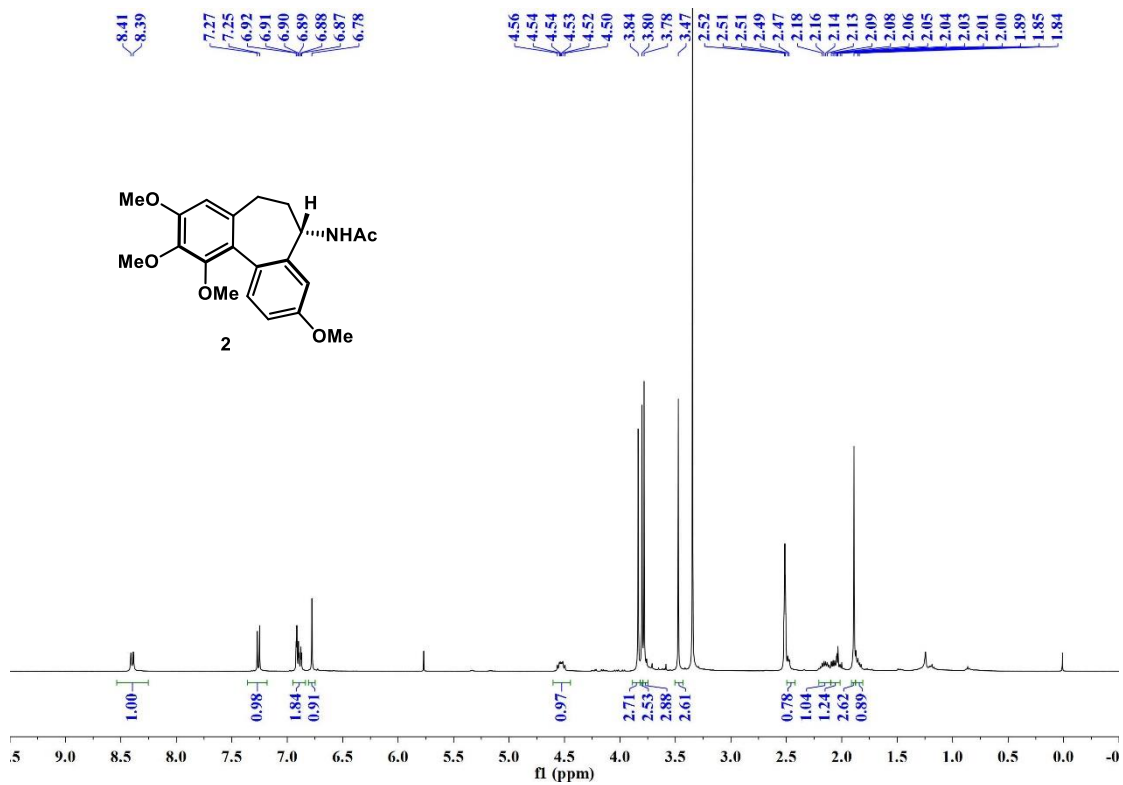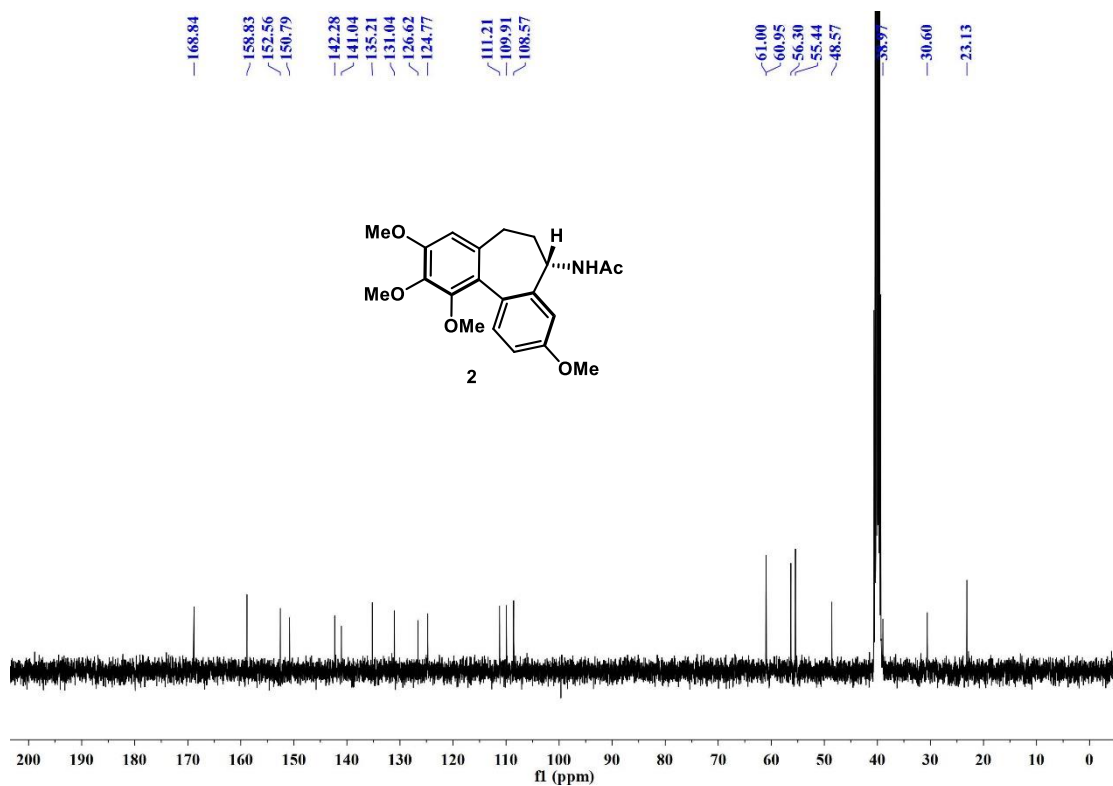



# Comparison of $^1\text{H}$ -NMR and $^{13}\text{C}$ -NMR spectra of NCME (2)

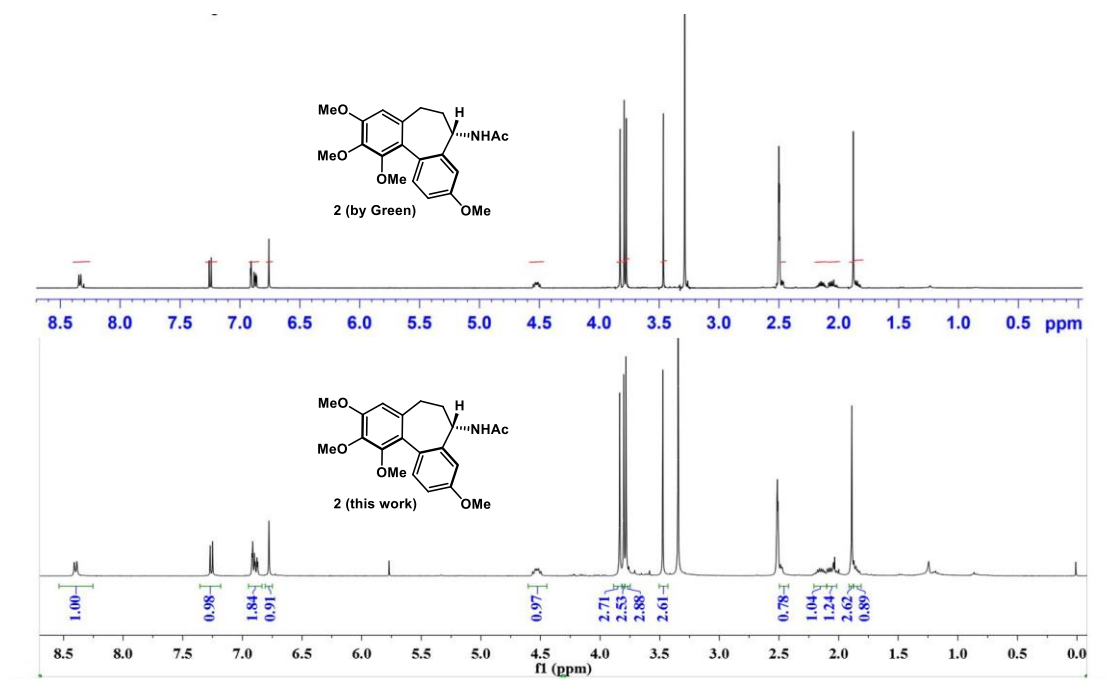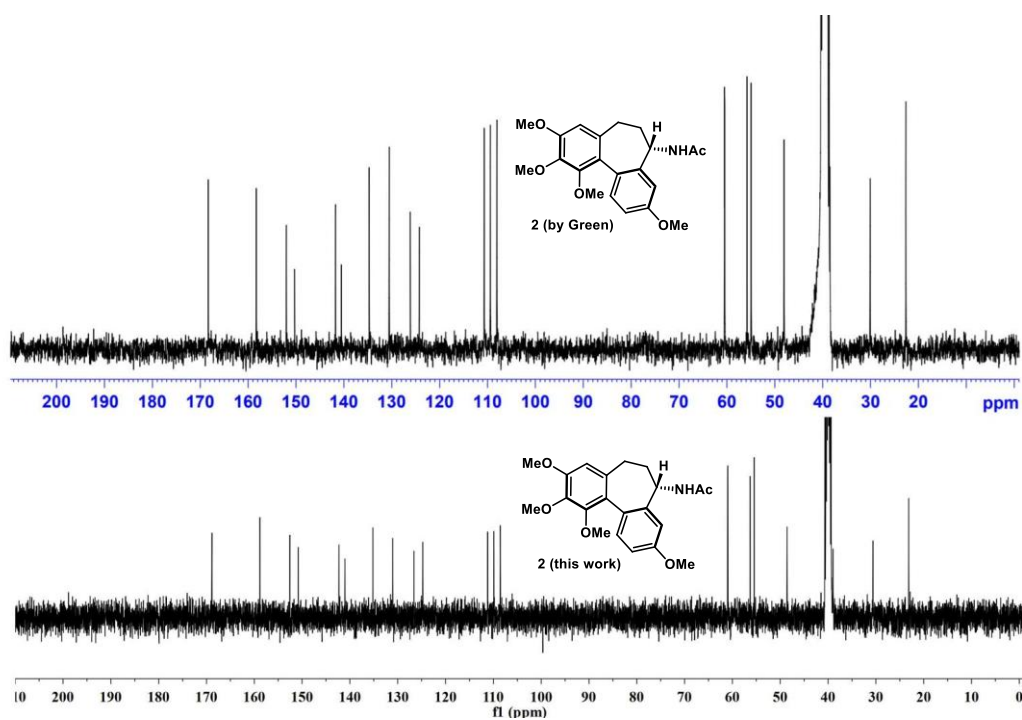

## VI References

- 1 Chen, B.; Liu, X.; Hu, Y.-J.; Zhang, D.-M.; Deng, L.-J.; Lu, J. Y.; Min, L.; Ye, W.-C.; Li, C.-C. *Chem. Sci.*, **2017**, *8*, 4961.
- 2 Grewe, R.; Wulf, W. *Chem. Ber.* **1951**, *84*, 621.
- 3 Djurdjevic, S.; Green, J. R. *Org. Lett.* **2007**, *9*, 5505.
